# Supplementary material for: PCDD/Fs and DL-PCBs in Chinese Mitten Crab (Eriocheir sinensis) and Its Farming Environment in Shanghai, China
Source: MDPI journal article supplement (doi:10.3390/foods11172556), 2022-08-24
Supplement: s1 [file s1]

## Article

# PCDD/Fs and DL-PCBs in Chinese Mitten Crab (*Eriocheir sinensis*) and Its Farming Environment in Shanghai, China

Ya Li Wang <sup>1,2,3</sup>, Si Ying Fei <sup>1,2,3</sup>, Tian Wei Wang <sup>1,2,3</sup>, Xue Ting Liu <sup>1,2,3</sup>, Xiao Nin Gao <sup>1,2,3</sup>, Hao Tian Wu <sup>1,2,3</sup> and Kun Hu <sup>1,2,3,\*</sup>

- <sup>1</sup> National Demonstration Center for Experimental Fisheries Science Education, Shanghai Ocean University, Shanghai 201306, China  
<sup>2</sup> National Pathogen Collection Center for Aquatic Animals, Shanghai Ocean University, Shanghai 201306, China  
<sup>3</sup> Key Laboratory of Freshwater Aquatic Genetic Resources, Ministry of Agriculture, Shanghai Ocean University, Shanghai 201306, China  
\* Correspondence: khu@shou.edu.cn

**Table S1.** Market crab sampling site information.

| Sample Number | Name of Market                                  | Latitude and Longitude |
|---------------|-------------------------------------------------|------------------------|
| CS1           | Agribusiness Supermarket (Guzong Road Store)    | 30.879999, 121.912126  |
| CS2           | Shangyou fresh Supermarket (Jiuxin Road Store)) | 31.132332, 121.317558  |
| CS3           | Luchaogang Seafood Market                       | 30.858812, 121.85068   |
| CS4           | RT-Mart(Ni Chen Store)                          | 30.909157, 121.819986  |
| CS5           | RT-Mart(Ni Chen Store)                          | 30.909157, 121.819986  |
| CS6           | RT-Mart(Ni Chen Store)                          | 30.909157, 121.819986  |
| CS7           | RT-Mart(Ni Chen Store)                          | 30.909157, 121.819986  |
| CS8           | Big mouth fresh Supermarket ( Yuxiu East Road)  | 31.626545, 121.39455   |
| CS9           | Walmart(Guilin Road)                            | 31.170957, 121.417017  |
| CS10          | Walmart(Guilin Road)                            | 31.170957, 121.417017  |
| CS11          | Ocean fresh supermarket(Xu Hui Store)           | 31.131148, 121.433076  |
| DD-1          | Agribusiness Supermarket (Guzong Road Store)    | 30.879999, 121.912126  |
| ZRZ1          | Qingcheng Vegetable Market                      | 31.626545, 121.39455   |
| ZRZ3          | Qingcheng Vegetable Market                      | 31.626545, 121.39455   |
| ZRZ4          | Qingcheng Vegetable Market                      | 31.626545, 121.39455   |
| ZRZ5          | Qingcheng Vegetable Market                      | 31.626545, 121.39455   |
| ZRZ6          | Qingcheng Vegetable Market                      | 31.626545, 121.39455   |
| ZRZ7          | Qingcheng Vegetable Market                      | 31.626545, 121.39455   |
| ZRZ8          | Qingcheng Vegetable Market                      | 31.626545, 121.39455   |
| ZRZ9          | Qingcheng Vegetable Market                      | 31.626545, 121.39455   |
| ZRZ10         | Qingcheng Vegetable Market                      | 31.626545, 121.39455   |
| gZL1          | Guzong Road Vegetable Market                    | 30.882815, 121.917545  |
| gZL2          | Guzong Road Vegetable Market                    | 30.882815, 121.917545  |
| gZL3          | Guzong Road Vegetable Market                    | 30.882815, 121.917545  |
| gZL4          | Guzong Road Vegetable Market                    | 30.882815, 121.917545  |
| gZL5          | Guzong Road Vegetable Market                    | 30.882815, 121.917545  |
| gZL6          | Guzong Road Vegetable Market                    | 30.882815, 121.917545  |

|      |                              |                       |
|------|------------------------------|-----------------------|
| ZBL1 | Zhubai Road Vegetable Market | 30.900998, 121.910281 |
| ZBL2 | Zhubai Road Vegetable Market | 30.900998, 121.910281 |
| ZBL3 | Zhubai Road Vegetable Market | 30.900998, 121.910281 |
| ZBL4 | Zhubai Road Vegetable Market | 30.900998, 121.910281 |
| ZBL5 | Zhubai Road Vegetable Market | 30.900998, 121.910281 |
| ZBL6 | Zhubai Road Vegetable Market | 30.900998, 121.910281 |
| ZBL7 | Zhubai Road Vegetable Market | 30.900998, 121.910281 |
| JD-1 | Jiangyang Seafood Market     | 31.356989, 121.453813 |
| JD-2 | Jiangyang Seafood Market     | 31.356989, 121.453813 |

**Table S2.** Summary of 29 compounds and WHO 2005 TEF Values.

| Compound                               | WHO 2005 TEF |
|----------------------------------------|--------------|
| Chlorinated dibenzo- <i>p</i> -dioxins |              |
| 2,3,7,8-TCDD                           | 1            |
| 1,2,3,7,8-PeCDD                        | 1            |
| 1,2,3,4,7,8-HxCDD                      | 0.1          |
| 1,2,3,6,7,8-HxCDD                      | 0.1          |
| 1,2,3,7,8,9-HxCDD                      | 0.1          |
| 1,2,3,4,6,7,8-HpCDD                    | 0.01         |
| OCDD                                   | 0.0003       |
| Chlorinated dibenzofurans              |              |
| 2,3,7,8-TCDF                           | 0.1          |
| 1,2,3,7,8-PeCDF                        | 0.03         |
| 2,3,4,7,8-PeCDF                        | 0.3          |
| 1,2,3,4,7,8-HxCDF                      | 0.1          |
| 1,2,3,6,7,8-HxCDF                      | 0.1          |
| 1,2,3,7,8,9-HxCDF                      | 0.1          |
| 2,3,4,6,7,8-HxCDF                      | 0.1          |
| 1,2,3,4,6,7,8-HpCDF                    | 0.01         |
| 1,2,3,4,6,7,8,9-HpCDF                  | 0.01         |
| OCDF                                   | 0.0003       |
| Non- <i>ortho</i> -substituted PCBs    |              |
| 3,3',4,4'-tetraCB (PCB 77)             | 0.0001       |
| 3,4,4',5-tetraCB (PCB 81)              | 0.0003       |
| 3,3',4,4',5-pentaCB (PCB 126)          | 0.1          |
| 3,3',4,4',5,5'-hexaCB (PCB 169)        | 0.03         |
| Mono- <i>ortho</i> -substituted PCBs   |              |
| 2,3,3',4,4'-pentaCB (PCB 105)          | 0.00003      |
| 2,3,4,4',5-pentaCB (PCB 114)           | 0.00003      |
| 2,3',4,4',5-pentaCB (PCB 118)          | 0.00003      |
| 2',3,4,4',5-pentaCB (PCB 123)          | 0.00003      |
| 2,3,3',4,4',5-hexaCB (PCB 156)         | 0.00003      |
| 2,3,3',4,4',5'-hexaCB (PCB 157)        | 0.00003      |
| 2,3',4,4',5,5'-hexaCB (PCB 167)        | 0.00003      |
| 2,3,3',4,4',5,5'-heptaCB (PCB 189)     | 0.00003      |

Note: TEF means toxic equivalency factor. WHO 2005 TEF was formulated to harmonize the toxic equivalency factors (TEFs) for the international level of dioxin and dioxin-like compounds.

**Table S3.** Solutions of isotopically labelled quantitative internal standards for PCDD/Fs and DL-PCBs.

| Category             | Congener name                                         | Number      |
|----------------------|-------------------------------------------------------|-------------|
| PCDD/Fs <sup>a</sup> | <sup>13</sup> C <sub>12</sub> -2,3,7,8-TCDF           | 76523-40-5  |
|                      | <sup>13</sup> C <sub>12</sub> -2,3,7,8-TCDD           | 89059-46-1  |
|                      | <sup>13</sup> C <sub>12</sub> -1,2,3,7,8-PeCDF        | 109719-79-1 |
|                      | <sup>13</sup> C <sub>12</sub> -2,3,4,7,8-PeCDF        | 109719-77-9 |
|                      | <sup>13</sup> C <sub>12</sub> -1,2,3,7,8-PeCDD        | 116843-02-8 |
|                      | <sup>13</sup> C <sub>12</sub> -1,2,3,4,7,8-HxCDF      | 109719-80-4 |
|                      | <sup>13</sup> C <sub>12</sub> -1,2,3,6,7,8-HxCDF      | 109719-81-5 |
|                      | <sup>13</sup> C <sub>12</sub> -2,3,4,6,8,9-HxCDF      | 114423-98-2 |
|                      | <sup>13</sup> C <sub>12</sub> -1,2,3,7,8,9-HxCDF      | 116843-03-9 |
|                      | <sup>13</sup> C <sub>12</sub> -1,2,3,4,7,8-HxCDD      | 116843-04-0 |
|                      | <sup>13</sup> C <sub>12</sub> -1,2,3,6,7,8-HxCDD      | 116843-05-1 |
|                      | <sup>13</sup> C <sub>12</sub> -1,2,3,4,6,7,8-HpCDF    | 109719-83-7 |
|                      | <sup>13</sup> C <sub>12</sub> -1,2,3,4,7,8,9-HpCDF    | 109719-84-8 |
|                      | <sup>13</sup> C <sub>12</sub> -1,2,3,4,6,7,8-HpCDD    | 109719-94-0 |
|                      | <sup>13</sup> C <sub>12</sub> -OCDD                   | 114423-97-1 |
| DL-PCB <sup>b</sup>  | <sup>13</sup> C <sub>12</sub> -3,4,4',5'-TePCB        | 81L         |
|                      | <sup>13</sup> C <sub>12</sub> -3,3',4,4'-TePCB        | 77L         |
|                      | <sup>13</sup> C <sub>12</sub> -2,3,3',4,4'-PePCB      | 105L        |
|                      | <sup>13</sup> C <sub>12</sub> -2,3,4,4',5'-PePCB      | 114L        |
|                      | <sup>13</sup> C <sub>12</sub> -2,3',4,4',5'-PePCB     | 118L        |
|                      | <sup>13</sup> C <sub>12</sub> -2',3,4,4',5'-PePCB     | 123L        |
|                      | <sup>13</sup> C <sub>12</sub> -3,3',4,4',5'-PePCB     | 126L        |
|                      | <sup>13</sup> C <sub>12</sub> -2,3,3',4,4',5'-HxPCB   | 156L        |
|                      | <sup>13</sup> C <sub>12</sub> -2,3,3',4,4',5'-HxPCB   | 157L        |
|                      | <sup>13</sup> C <sub>12</sub> -2,3',4,4',5,5'-HxPCB   | 167L        |
|                      | <sup>13</sup> C <sub>12</sub> -3,3',4,4',5,5'-HxPCB   | 169L        |
|                      | <sup>13</sup> C <sub>12</sub> -2,3,3',4,4',5,5'-HpPCB | 189L        |

Note: <sup>a</sup> number is the CAS login number. <sup>b</sup> is the International Union of Pure Applied Chemistry (IUPAC) code.

**Table S4.** Solutions of isotopically labelled recovery internal standards for PCDD/Fs and DL-PCBs.

| Category | Congener Name                                              | Concentration (µg/L) |
|----------|------------------------------------------------------------|----------------------|
| PCDD/Fs  | <sup>13</sup> C <sub>12</sub> -2,3,7,8-TCDD                | 200 ± 10             |
|          | <sup>13</sup> C <sub>12</sub> -1,2,3,7,8,9-HxCDD           | 200 ± 10             |
| DL-PCBs  | <sup>13</sup> C <sub>12</sub> -3,2',5,5'-TePCB             | 5                    |
|          | <sup>13</sup> C <sub>12</sub> -2,2,4',5,5'-PePCB           | 5                    |
|          | <sup>13</sup> C <sub>12</sub> -2,2',3',4,4',5'-HxPCB       | 5                    |
|          | <sup>13</sup> C <sub>12</sub> -2,2',3,3',4,4',5,5'-OctaPCB | 5                    |

**Table S5.** The concentrations of PCDD/Fs and DL-PCBs in Chinese mitten crabs and the potential sources (pg/g dw, pg/g ww, pg/L).

| Farms                                                     | Samples         | PCDD /Fs | DL- PCBs | PCDD/Fs and DL-PCB |
|-----------------------------------------------------------|-----------------|----------|----------|--------------------|
| Shanghai Ruijie Aquaculture Professional Cooperative (RJ) | crab(RJG)       | 399.93   | 894.47   | 1294.39            |
|                                                           | sediment(RJCJW) | 24032.46 | 28.65    | 24061.10           |

|                                                           |                          |          |        |          |
|-----------------------------------------------------------|--------------------------|----------|--------|----------|
| Nanxin Village farm(NXC)                                  | aquatic plants(RJSC)     | 202.15   | 7.62   | 209.77   |
|                                                           | shore plants((RJZW)      | 73.14    | 14.55  | 87.69    |
|                                                           | aquaculture water(RJYS)  | 563.52   | 11.19  | 574.71   |
|                                                           | feed(RJSL)               | 2.56     | 65.81  | 68.37    |
|                                                           | crab(NXCG)               | 340.28   | 246.51 | 586.80   |
|                                                           | sediment(NXCCJW)         | 17260.89 | 11.84  | 17272.73 |
|                                                           | aquatic plants(NXCSC)    | 146.56   | 2.12   | 148.67   |
|                                                           | shore plants(NXCZW)      | 186.02   | 8.28   | 194.30   |
|                                                           | aquaculture water(NXCYS) | 129.43   | 2.93   | 132.36   |
|                                                           | feed(NXCSL)              | 1.38     | 63.38  | 65.05    |
| Shanghai Mahe Product Professional Cooperative (MH)       | crab(MHG)                | 686.64   | 502.84 | 1189.48  |
|                                                           | sediment(MHCJW)          | 35223.59 | 78.08  | 35301.67 |
|                                                           | aquatic plants(MHSC)     | 51.88    | 2.95   | 54.84    |
|                                                           | shore plants(MHZW)       | 14.19    | 9.17   | 23.36    |
|                                                           | aquaculture water(MHYS)  | 341.67   | 3.57   | 345.24   |
|                                                           | feed(MHSL)               | 1.94     | 5.32   | 7.26     |
|                                                           | crab(ZHG)                | 20.45    | 347.31 | 367.76   |
|                                                           | sediment(ZHCJW)          | 101.98   | 7.04   | 109.02   |
|                                                           | aquatic plants(ZHSC)     | 1.19     | 2.09   | 3.28     |
|                                                           | shore plants(ZHZW)       | 1.90     | 1.56   | 3.46     |
| Shanghai Zihao Industrial Development Company Limited(ZH) | aquaculture water(ZHYS)  | 5.17     | 11.96  | 17.14    |
|                                                           | feed(ZHSL)               | 1.16     | 35.62  | 36.78    |
|                                                           | crab(ZHG)                | 63.84    | 604.32 | 668.16   |
|                                                           | sediment(ZHCJW)          | 63.84    | 604.32 | 668.16   |
|                                                           | aquatic plants(ZHSC)     | 416.68   | 2.44   | 419.12   |
|                                                           | shore plants(ZHZW)       | 1.09     | 1.08   | 2.17     |
|                                                           | aquaculture water(ZHYS)  | 188.61   | 1.25   | 189.86   |
|                                                           | feed(ZHSL)               | 1.32     | 35.25  | 35.57    |
|                                                           | crab(HKG)                | 74.08    | 442.06 | 516.14   |
|                                                           | sediment(HKCJW)          | 170.10   | 23.77  | 193.86   |
| Shanghai Huikang Aquaculture professional cooperative(HK) | aquatic plants(HKSC)     | 2.31     | 0.97   | 3.28     |

|                              |      |       |       |
|------------------------------|------|-------|-------|
| shore<br>plants(HKZW)        | 1.44 | 2.47  | 3.91  |
| aquaculture wa-<br>ter(HKYS) | 5.61 | 2.69  | 8.30  |
| feed(HKSL)                   | 0.74 | 26.52 | 27.27 |

Note: The concentration unit of sediment samples in this table is pg/g dw, the concentration unit of aquaculture water samples in this table is pg/L, and the concentration unit of other samples is pg/g. ww: dry weight; ww: Wet weight.

**Table S6.** PCDD/F and DL-PCB TEQs in Chinese mitten crabs from fresh markets (pg TEQ/g ww).

| Sample Number | PCDD/Fs | DL-PCBs | PCDD/Fs and DL-PCBs |
|---------------|---------|---------|---------------------|
| CS1           | 0.530   | 0.840   | 1.37                |
| CS2           | 0.700   | 0.130   | 0.830               |
| CS3           | 0.280   | 0.770   | 1.05                |
| CS4           | 0.450   | 1.99    | 2.44                |
| CS5           | 1.88    | 2.34    | 4.22                |
| CS6           | 4.08    | 0.850   | 4.93                |
| CS7           | 1.06    | 1.50    | 2.56                |
| CS8           | 0.710   | 0.920   | 1.63                |
| CS9           | 0.940   | 1.49    | 2.42                |
| CS10          | 0.360   | 1.05    | 1.42                |
| CS11          | 0.680   | 1.22    | 1.91                |
| DD-1          | 0.520   | 0.78    | 1.31                |
| ZRZ1          | 0.280   | 0.380   | 0.660               |
| ZRZ3          | 4.36    | 2.26    | 6.62                |
| ZRZ4          | 1.24    | 1.13    | 2.36                |
| ZRZ5          | 0.850   | 0.930   | 1.79                |
| ZRZ6          | 1.18    | 1.17    | 2.36                |
| ZRZ7          | 0.960   | 0.510   | 1.47                |
| ZRZ8          | 0.720   | 0.280   | 1.00                |
| ZRZ9          | 1.14    | 0.750   | 1.89                |
| ZRZ10         | 1.74    | 0.790   | 2.53                |
| gZL1          | 0.290   | 0.920   | 1.20                |
| gZL2          | 0.490   | 0.600   | 1.09                |
| gZL3          | 1.68    | 1.56    | 3.24                |
| gZL4          | 1.90    | 1.78    | 3.68                |
| gZL5          | 3.31    | 1.49    | 4.80                |
| gZL6          | 8.80    | 2.00    | 10.8                |
| ZBL1          | 0.360   | 1.11    | 1.47                |
| ZBL2          | 0.110   | 0.230   | 0.330               |
| ZBL3          | 0.160   | 0.400   | 0.560               |
| ZBL4          | 0.440   | 0.600   | 1.05                |
| ZBL5          | 0.530   | 1.11    | 1.64                |
| ZBL6          | 0.850   | 0.860   | 1.70                |
| ZBL7          | 0.610   | 0.990   | 1.60                |
| JD-1          | 7.11    | 1.28    | 8.39                |
| JD-2          | 4.59    | 0.720   | 5.32                |

Note: ww: wet weight.

**Table S7.** The total PCDD/F and DL-PCB TEQs in Chinese mitten crabs and the potential sources (pg TEQ/g dw, pg TEQ/g ww, pg TEQ/L).

| Farms                                                     | Samples                  | PCDD/<br>Fs | DL-<br>PCBs | PCDD/Fs and<br>DL-PCB |
|-----------------------------------------------------------|--------------------------|-------------|-------------|-----------------------|
| Shanghai Ruijie Aquaculture Professional Cooperative (RJ) | crab(RJG)                | 11.05       | 1.00        | 12.05                 |
|                                                           | sediment(RJCJW)          | 18.25       | 0.04        | 18.30                 |
|                                                           | aquatic plants(RJSC)     | 0.32        | 0.01        | 0.33                  |
|                                                           | shore plants((RJZW)      | 0.17        | 0.02        | 0.19                  |
|                                                           | aquaculture water(RJYS)  | 0.91        | 0.15        | 1.06                  |
|                                                           | feed(RJSL)               | 0.26        | 0.08        | 0.34                  |
| Nanxin Village farm(NXC)                                  | crab(NXCG)               | 28.14       | 1.19        | 29.34                 |
|                                                           | sediment(NXCCJW)         | 17.36       | 0.07        | 17.42                 |
|                                                           | aquatic plants(NXCSC)    | 0.23        | 0.01        | 0.24                  |
|                                                           | shore plants(NXCZW)      | 0.27        | 0.05        | 0.32                  |
|                                                           | aquaculture water(NXCYS) | 0.27        | 0.01        | 0.28                  |
|                                                           | feed(NXCSL)              | 0.17        | 0.05        | 0.22                  |
| Shanghai Mahe Product Professional Cooperative (MH)       | crab(MHG)                | 2.97        | 1.06        | 4.03                  |
|                                                           | sediment(MHCJW)          | 24.81       | 0.07        | 24.89                 |
|                                                           | aquatic plants(MHSC)     | 0.10        | 0.01        | 0.11                  |
|                                                           | shore plants(MHZW)       | 0.08        | 0.04        | 0.13                  |
|                                                           | aquaculture water(MHYS)  | 0.57        | 0.01        | 0.58                  |
|                                                           | feed(MHSL)               | 0.22        | 0.02        | 0.24                  |
| Shanghai Zihao Industrial Development Company Limited(ZH) | crab(ZHG)                | 0.59        | 0.64        | 1.23                  |
|                                                           | sediment(ZHCJW)          | 0.47        | 0.02        | 0.49                  |
|                                                           | aquatic plants(ZHSC)     | 0.07        | 0.00        | 0.07                  |
|                                                           | shore plants(ZHZW)       | 0.10        | 0.00        | 0.11                  |
|                                                           | aquaculture water(ZHYS)  | 0.58        | 0.22        | 0.80                  |
|                                                           | feed(ZHSL)               | 0.09        | 0.50        | 0.60                  |
| Shanghai Yufeng Aquaculture Professional Cooperative(YF)  | crab(ZHG)                | 7.50        | 0.60        | 8.10                  |
|                                                           | sediment(ZHCJW)          | 1.23        | 0.02        | 1.25                  |
|                                                           | aquatic plants(ZHSC)     | 2.77        | 0.01        | 2.77                  |
|                                                           | shore plants(ZHZW)       | 0.07        | 0.00        | 0.07                  |
|                                                           | aquaculture water(ZHYS)  | 0.22        | 0.01        | 0.23                  |
|                                                           | feed(ZHSL)               | 0.08        | 0.14        | 0.22                  |
|                                                           | crab(HKG)                | 1.70        | 0.76        | 2.46                  |
|                                                           | sediment(HKCJW)          | 0.43        | 0.04        | 0.48                  |

|                                                           |                         |      |      |      |
|-----------------------------------------------------------|-------------------------|------|------|------|
| Shanghai Huikang Aquaculture professional cooperative(HK) | aquatic plants(HKSC)    | 0.04 | 0.01 | 0.05 |
|                                                           | shore plants(HKZW)      | 0.16 | 0.01 | 0.17 |
|                                                           | aquaculture water(HKYS) | 0.25 | 0.01 | 0.26 |
|                                                           | feed(HKSL)              | 0.05 | 0.23 | 0.28 |

Note: The concentration unit of the sediment samples in this table is pg TEQ/g dw, the concentration unit of the aquaculture water samples in this table is pg TEQ/L, and the concentration unit of other samples is pg TEQ/g ww.

**Table S8.** The concentrations of PCDD/Fs and DL-PCBs in market crabs (pg/g ww).

| Sample Number | PCDD/Fs | DL-PCBs | PCDD/Fs and DL-PCBs |
|---------------|---------|---------|---------------------|
| CS1           | 4.64    | 398.94  | 403.58              |
| CS2           | 6.13    | 428.82  | 434.95              |
| CS3           | 2.86    | 439.57  | 442.43              |
| CS4           | 4.42    | 745.49  | 749.93              |
| CS5           | 10.44   | 983.44  | 993.88              |
| CS6           | 27.03   | 745.49  | 749.92              |
| CS7           | 7.69    | 563.91  | 571.60              |
| CS8           | 5.27    | 575.59  | 580.85              |
| CS9           | 7.76    | 431.01  | 438.77              |
| CS10          | 2.88    | 410.47  | 413.35              |
| CS11          | 10.79   | 775.72  | 786.50              |
| DD-1          | 5.84    | 315.19  | 321.03              |
| ZRZ1          | 2.32    | 239.75  | 242.07              |
| ZRZ3          | 66.71   | 1204.47 | 1271.17             |
| ZRZ4          | 8.59    | 863.97  | 872.56              |
| ZRZ5          | 7.00    | 677.95  | 684.95              |
| ZRZ6          | 9.56    | 805.63  | 815.18              |
| ZRZ7          | 5.97    | 272.89  | 278.86              |
| ZRZ8          | 5.23    | 223.62  | 228.85              |
| ZRZ9          | 9.69    | 345.16  | 354.85              |
| ZRZ10         | 11.62   | 368.17  | 379.79              |
| gZL1          | 2.46    | 476.11  | 478.57              |
| gZL2          | 3.33    | 719.77  | 723.10              |
| gZL3          | 17.76   | 697.53  | 715.29              |
| gZL4          | 27.69   | 802.91  | 830.60              |
| gZL5          | 29.62   | 422.68  | 452.30              |
| gZL6          | 77.67   | 534.79  | 612.46              |
| ZBL1          | 6.36    | 551.52  | 557.88              |
| ZBL2          | 0.81    | 253.83  | 254.64              |
| ZBL3          | 5.60    | 362.00  | 367.60              |
| ZBL4          | 3.36    | 670.57  | 673.92              |
| ZBL5          | 4.83    | 541.15  | 545.98              |
| ZBL6          | 6.61    | 584.25  | 590.86              |
| ZBL7          | 19.00   | 746.86  | 765.86              |
| JD-1          | 237.05  | 1801.41 | 2038.46             |
| JD-2          | 228.44  | 1934.88 | 2163.32             |

**Table S9.** Ratios of DL-PCBs / PCDD/Fs in farm Chinese mitten crabs and potential sources (pg TEQ/g dw).

| District                           | Samples | PCDD/Fs | DL-PCBs | PCDD/Fs and DL-PCB |
|------------------------------------|---------|---------|---------|--------------------|
| Shanghai Qingpu District, China    | MHTR    | 4.86    | 0.03    | 4.89               |
|                                    | RJTR    | 19.01   | 0.06    | 19.07              |
|                                    | NXCTR   | 3.76    | 0.02    | 3.78               |
| Shanghai Chongming District, China | YFTR    | 0.98    | 0.02    | 1.00               |
|                                    | HKTR    | 0.88    | 0.01    | 0.89               |
|                                    | ZHTR    | 0.83    | 0.04    | 0.86               |

Informed Detection Limit (DL) and the percentage of recovery for polychlorido-benzo-p-dioxins/furans (PCDD/Fs) and polychlorobiphenyls (PCBs).

The average detection limits for PCDD/Fs and PCBs in the samples were 3.99 pg and 2.58 pg, respectively. The average recovery rates of  $^{13}\text{C}_{12}$ -labeled PCDD/Fs and PCBs toxic counterparts ranged from 25 to 110 percent and 45 percent to 117 percent, respectively, in line with the U.S. Environmental Protection Agency's 1613 and 1668B methods and the National Food Safety Standard - Determination of toxic equivalent of dioxins and their analogs in food (GB 5009.205 - 2013) requirements.

**Table S10.** Informed detection limit (DL) of the method and the percentage of recovery of each PCDD/F and DL-PCB congener analyzed.

| Congener Name                                | Chinese Mitten crabs |         | Sediment   |         | Aquaculture Water |         | Aquatic Plants |         | Shore Plants |         | Feed       |         |
|----------------------------------------------|----------------------|---------|------------|---------|-------------------|---------|----------------|---------|--------------|---------|------------|---------|
|                                              | Recovery %           | DL (pg) | Recovery % | DL (pg) | Recovery %        | DL (pg) | Recovery %     | DL (pg) | Recovery %   | DL (pg) | Recovery % | DL (pg) |
| $^{13}\text{C}_{12}$ -2,3,7,8-TCDF           | 65.0                 | 2.31    | 73.8       | 1.10    | 57.5              | 1.88    | 76.2           | 2.52    | 66.7         | 3.15    | 65.8       | 2.73    |
| $^{13}\text{C}_{12}$ -2,3,7,8-TCDD           | 64.7                 | 5.28    | 77.8       | 2.92    | 57.3              | 4.73    | 90.5           | 3.95    | 110          | 7.77    | 71.0       | 6.31    |
| $^{13}\text{C}_{12}$ -1,2,3,7,8-PeCDF        | 65.8                 | 3.28    | 71.4       | 2.21    | 41.8              | 2.63    | 55.8           | 2.88    | 82.2         | 4.49    | 65.2       | 3.79    |
| $^{13}\text{C}_{12}$ -2,3,4,7,8-PeCDF        | 58.0                 | 3.27    | 68.0       | 2.21    | 41.8              | 2.63    | 69.3           | 2.88    | 48.3         | 4.49    | 60.0       | 3.79    |
| $^{13}\text{C}_{12}$ -1,2,3,7,8-PeCDD        | 67.5                 | 2.01    | 74.2       | 2.14    | 46.8              | 1.69    | 85.0           | 2.40    | 87.5         | 3.52    | 68.0       | 2.39    |
| $^{13}\text{C}_{12}$ -1,2,3,4,7,8-HxCDF      | 70.2                 | 6.33    | 84.6       | 1.00    | 58.2              | 5.30    | 71.8           | 4.59    | 54.7         | 6.78    | 78.3       | 7.36    |
| $^{13}\text{C}_{12}$ -1,2,3,6,7,8-HxCDF      | 84.3                 | 5.90    | 84.7       | 0.933   | 63.0              | 4.94    | 78.2           | 4.27    | 62.2         | 6.32    | 86.2       | 6.86    |
| $^{13}\text{C}_{12}$ -2,3,4,6,8,9-HxCDF      | 75.8                 | 6.26    | 80.7       | 0.992   | 60.3              | 5.23    | 77.2           | 4.53    | 57.7         | 6.70    | 77.7       | 7.27    |
| $^{13}\text{C}_{12}$ -1,2,3,7,8,9-HxCDF      | 57.0                 | 6.32    | 60.0       | 1.00    | 45.3              | 5.29    | 66.5           | 4.58    | 91.5         | 6.77    | 58.7       | 7.35    |
| $^{13}\text{C}_{12}$ -1,2,3,4,7,8-HxCDD      | 77.5                 | 6.95    | 75.9       | 1.21    | 57.5              | 6.20    | 84.0           | 3.82    | 64.5         | 5.11    | 76.3       | 7.49    |
| $^{13}\text{C}_{12}$ -1,2,3,6,7,8-HxCDD      | 97.8                 | 6.76    | 89.1       | 1.18    | 71.2              | 6.04    | 78.3           | 3.72    | 65.2         | 4.97    | 94.3       | 7.28    |
| $^{13}\text{C}_{12}$ -1,2,3,4,6,7,8-HpCDF    | 55.0                 | 3.78    | 62.0       | 0.840   | 49.0              | 2.98    | 47.2           | 2.22    | 39.8         | 3.46    | 59.5       | 4.22    |
| $^{13}\text{C}_{12}$ -1,2,3,4,7,8,9-HpCDF    | 41.8                 | 4.51    | 54.6       | 1.00    | 35.3              | 3.54    | 35.8           | 2.64    | 49.8         | 4.13    | 47.7       | 5.03    |
| $^{13}\text{C}_{12}$ -1,2,3,4,6,7,8-HpCDD    | 53.7                 | 2.97    | 63.9       | 0.772   | 46.5              | 3.09    | 49.3           | 2.53    | 60.0         | 3.45    | 56.2       | 3.25    |
| $^{13}\text{C}_{12}$ -OCDD                   | 30.2                 | 3.67    | 45.2       | 1.79    | 31.7              | 4.38    | 34.8           | 3.82    | 51.2         | 6.38    | 25.3       | 3.60    |
| $^{13}\text{C}_{12}$ -3,4,4',5'-TePCB        | 83.0                 | 0.752   | 63.1       | 0.694   | 67.8              | 0.752   | 100            | 1.04    | 88.5         | 1.37    | 78.3       | 0.913   |
| $^{13}\text{C}_{12}$ -3,3',4,4'-TePCB        | 84.8                 | 0.755   | 62.2       | 0.702   | 67.7              | 0.755   | 76.0           | 1.05    | 78.8         | 1.37    | 53.7       | 0.923   |
| $^{13}\text{C}_{12}$ -2,3,3',4,4'-PePCB      | 58.8                 | 2.50    | 85.5       | 1.64    | 62.8              | 2.15    | 48.2           | 3.86    | 46.8         | 4.35    | 90.3       | 2.19    |
| $^{13}\text{C}_{12}$ -2,3,4,4',5'-PePCB      | 72.0                 | 2.51    | 89.9       | 1.64    | 64.5              | 2.15    | 112            | 3.87    | 111          | 4.36    | 96.7       | 2.20    |
| $^{13}\text{C}_{12}$ -2,3',4,4',5'-PePCB     | 67.8                 | 2.42    | 78.7       | 1.59    | 60.2              | 2.08    | 106            | 3.73    | 99.2         | 4.21    | 86.8       | 2.12    |
| $^{13}\text{C}_{12}$ -2',3,4,4',5'-PePCB     | 67.2                 | 2.44    | 78.0       | 1.60    | 59.3              | 2.10    | 106            | 3.77    | 104          | 4.25    | 86.7       | 2.14    |
| $^{13}\text{C}_{12}$ -3,3',4,4',5'-PePCB     | 117                  | 1.82    | 104        | 1.19    | 62.8              | 1.56    | 107            | 2.81    | 103          | 3.16    | 51.7       | 1.60    |
| $^{13}\text{C}_{12}$ -2,3,3',4,4',5HxPCB     | 65.5                 | 3.19    | 87.9       | 1.94    | 47.3              | 2.21    | 87.5           | 5.67    | 64.0         | 3.96    | 97.0       | 2.76    |
| $^{13}\text{C}_{12}$ -2,3,3',4,4',5'-HxPCB   | 64.2                 | 3.22    | 87.6       | 1.94    | 60.2              | 2.23    | 90.2           | 5.74    | 74.3         | 4.01    | 97.3       | 2.79    |
| $^{13}\text{C}_{12}$ -2,3',4,4',5,5'-HxPCB   | 65.7                 | 3.04    | 88.1       | 1.83    | 55.5              | 2.10    | 98.3           | 5.42    | 79.0         | 3.78    | 95.3       | 2.63    |
| $^{13}\text{C}_{12}$ -3,3',4,4',5,5'-HxPCB   | 95.0                 | 2.93    | 87.8       | 1.76    | 58.3              | 2.03    | 90.0           | 5.22    | 78.3         | 3.65    | 63.5       | 2.54    |
| $^{13}\text{C}_{12}$ -2,3,3',4,4',5,5'-HpPCB | 72.7                 | 4.31    | 67.1       | 1.81    | 45.2              | 2.39    | 71.2           | 3.01    | 75.5         | 6.60    | 77.5       | 1.86    |



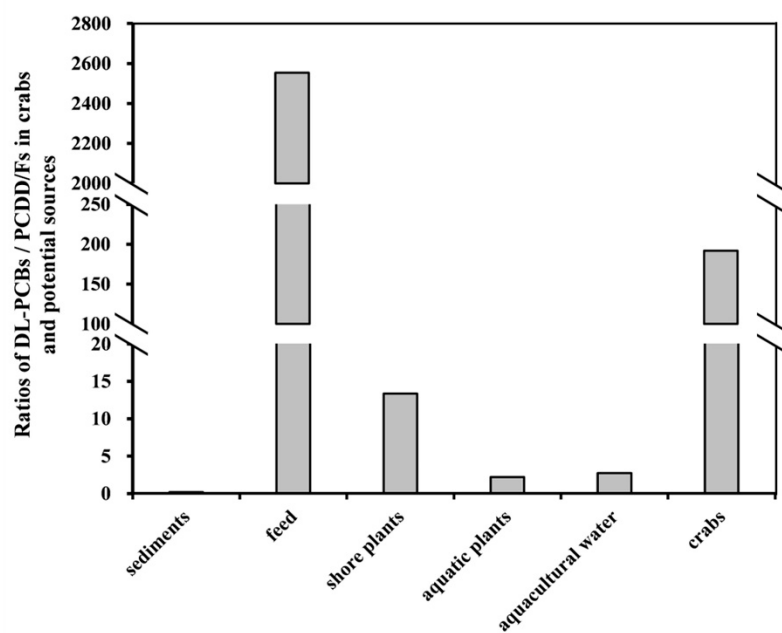

**Figure S1.** Ratios of DL-PCBs / PCDD/Fs in farm Chinese mitten crabs and potential sources.
